# Supplementary material for: Flagellar synchronization through direct hydrodynamic interactions
Source: eLife journal article supplement (doi:10.7554/elife.02750), 2014-07-29
Supplement: figures [file elife-02750-figures-v1.pdf]

---

## Figures and figure supplements

Flagellar synchronization through direct hydrodynamic interactions

**Douglas R Brumley, et al.**

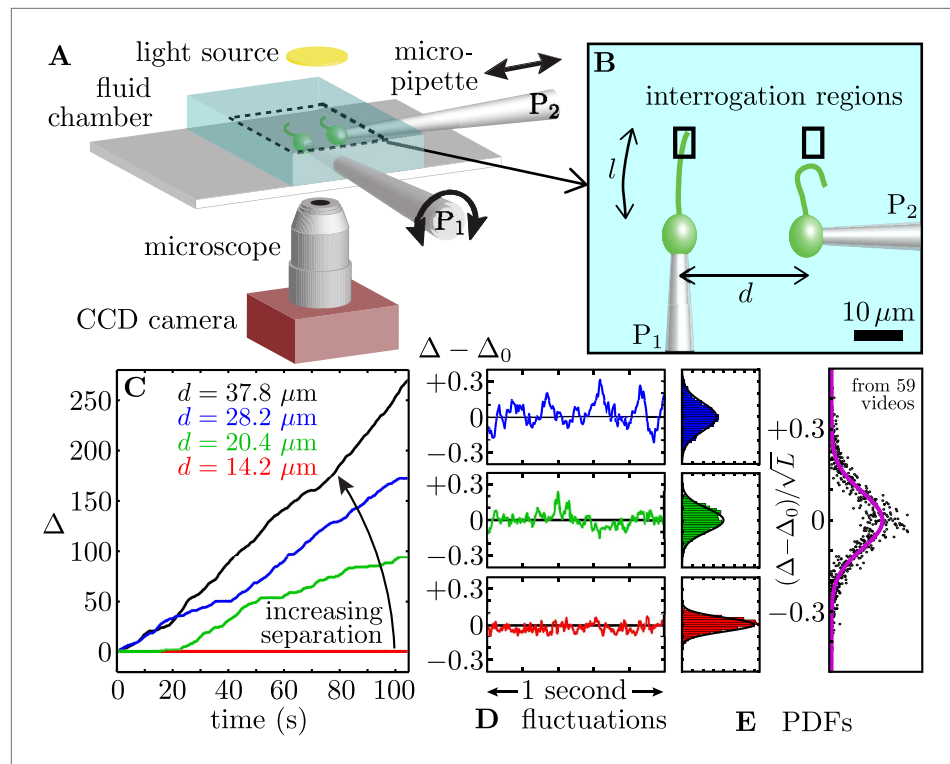

**Figure 1.** Synchronized pairs of beating flagella. **(A)** Experimental apparatus and **(B)** cell configuration. **(C)** Extracted phase difference  $\Delta = (\varphi_1 - \varphi_2)/2\pi$  at four different interflagellar spacings, as indicated. These separations correspond to scaled spacing  $L = d/l$  of 0.85, 1.22, 1.69, and 2.27. **(D)** fluctuations during phase-locked periods around the average phase lag,  $\Delta_0$ , and **(E)** the fluctuations' probability distribution functions (PDFs), each cast in terms of the rescaled separation-specific variable  $(\Delta - \Delta_0)/\sqrt{L}$ . Solid lines represent Gaussian fits. Further details of the phase extraction procedure can be found in **Figure 1—figure supplement 1**. Samples of the four processed videos corresponding to the cells in **Figure 1C** are shown in **Video 1**.

DOI: [10.7554/eLife.02750.003](https://doi.org/10.7554/eLife.02750.003)

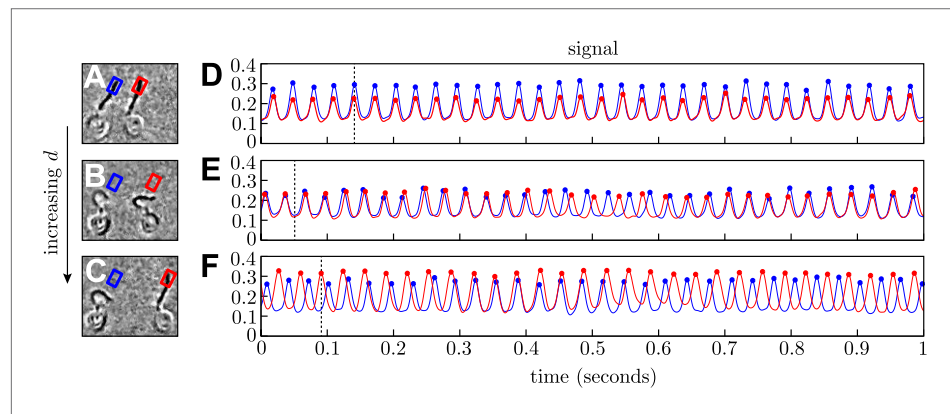

**Figure 1—figure supplement 1.** Phase extraction.

DOI: [10.7554/eLife.02750.004](https://doi.org/10.7554/eLife.02750.004)

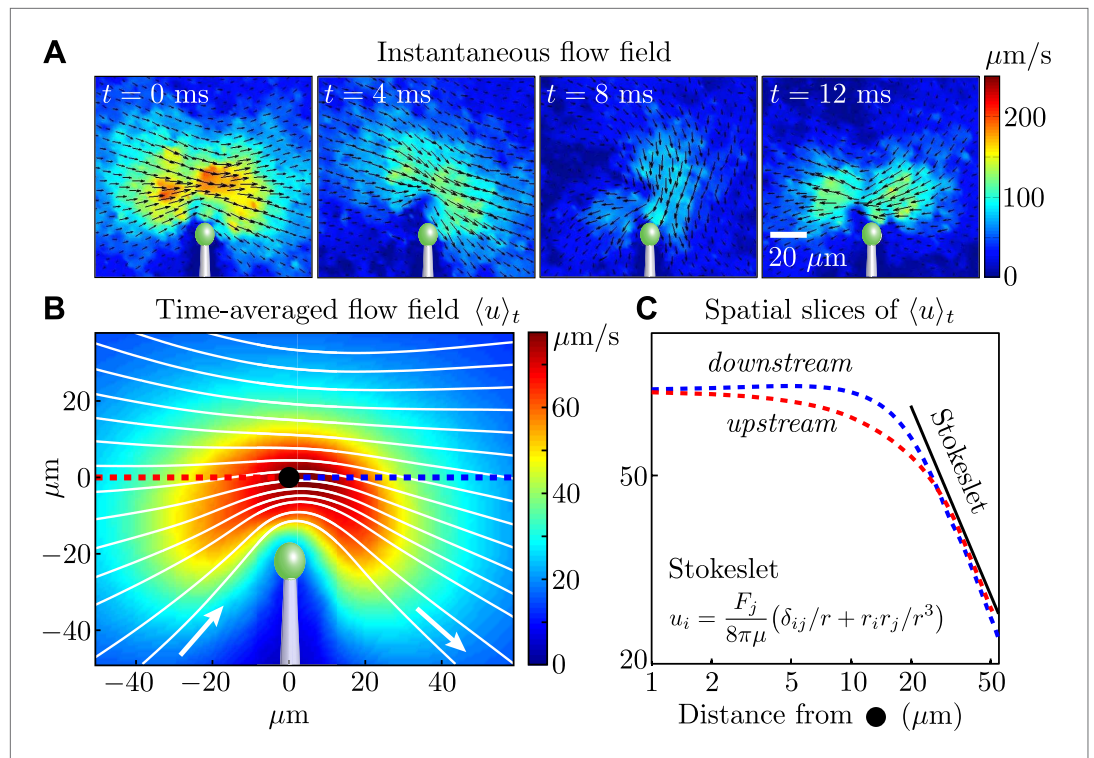

**Figure 2.** Measured flagellar flow field. **(A)** Time-dependent flow field for an individual cell measured using particle image velocimetry. Results are shown for the first half of the beating cycle. **(B)** Time-averaged flow field  $\langle u \rangle_t = (1/r) \int_0^r |\mathbf{u}(\mathbf{x}, t)| dt$  (averaged across 4 cells with  $r \sim 1000$  beats for each). The velocity magnitude (colour) and streamlines (white) are shown. **(C)** Velocity magnitude upstream (red) and downstream (blue) of the origin (black dot in **B**).

DOI: 10.7554/eLife.02750.005

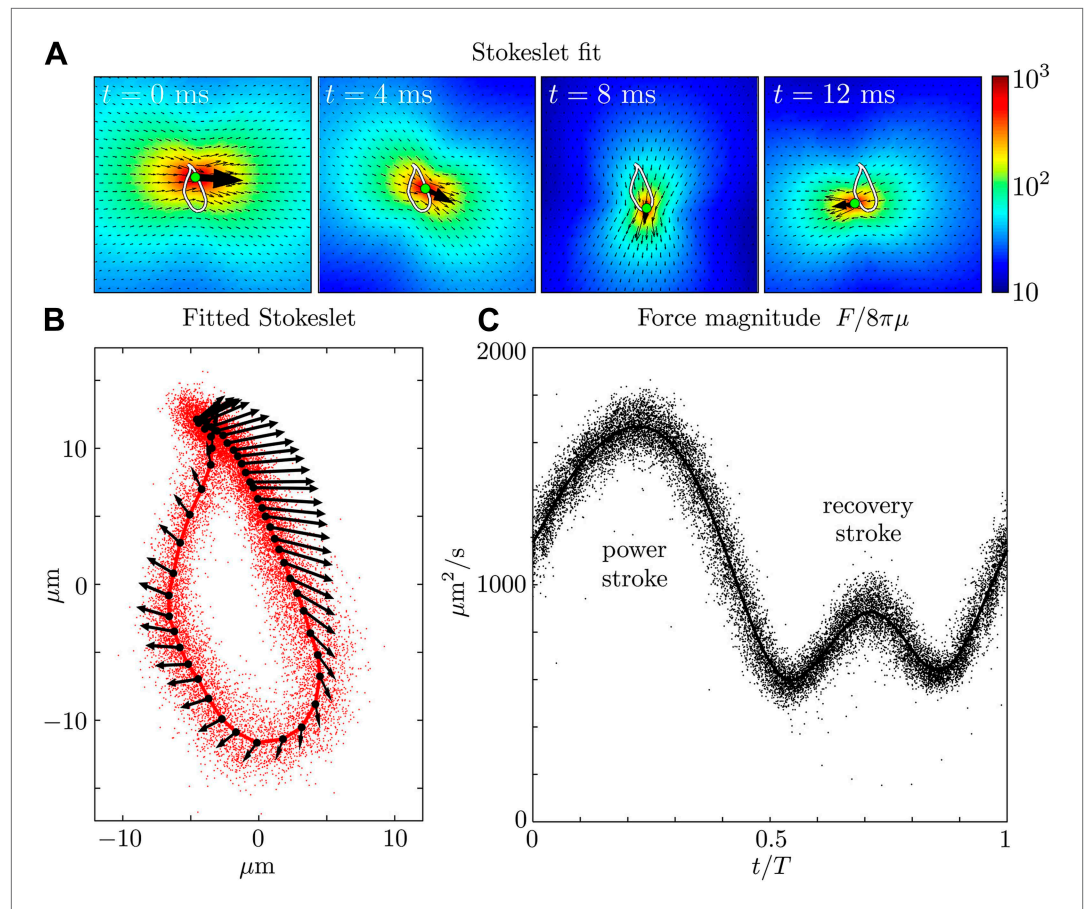

**Figure 3.** Force amplitude of flagellum. **(A)** Fitted instantaneous velocity field at various stages during the first half of one representative flagellar beat. **(B)** The fitted Stokeslet is shown at evenly-spaced times throughout the average flagellar beat cycle. The red dots indicate the Stokeslet position extracted from every frame. **(C)** Amplitude of the fitted point force as a function of time throughout the flagellar beat period  $T$ .

DOI: [10.7554/eLife.02750.006](https://doi.org/10.7554/eLife.02750.006)

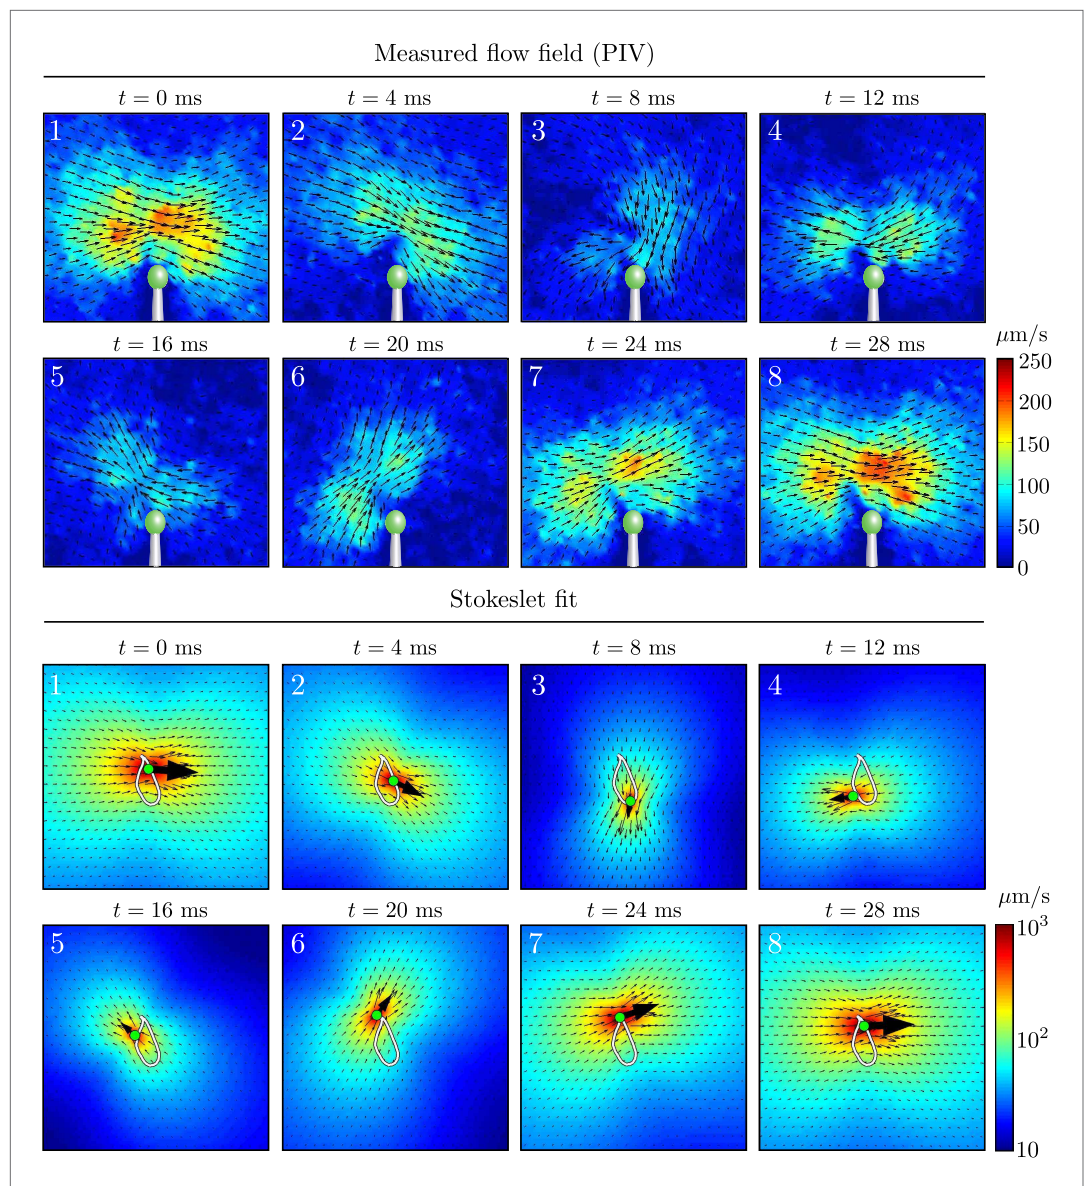

**Figure 3—figure supplement 1.** Time-dependent flow fields.

DOI: [10.7554/eLife.02750.007](https://doi.org/10.7554/eLife.02750.007)

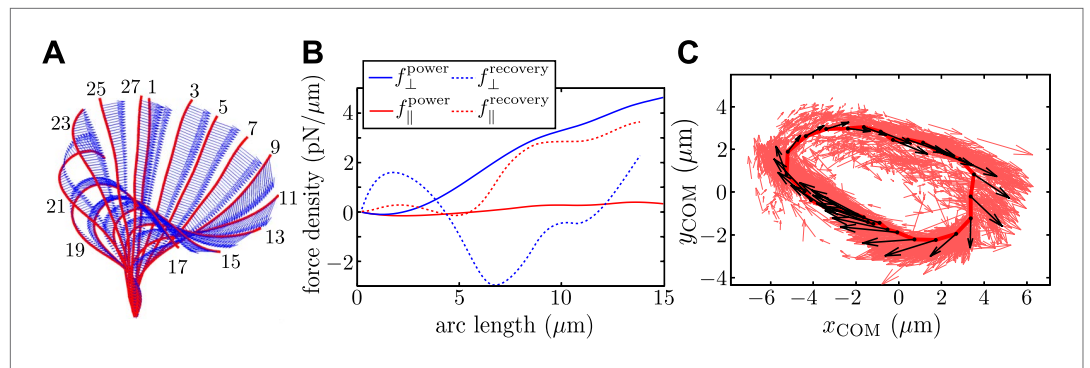

**Figure 4.** Resistive force theory analysis. **(A)** Instantaneous velocity distribution along the flagellum during one complete beat cycle (indexed by frame number, imaged at 1000 fps). **(B)** Components of integrated force density produced by a flagellum executing characteristic power and recovery strokes, as a function of arclength along the flagellum measured from the basal to the distal end. **(C)** Integrated vector forces  $\mathbf{F}(t)$  shown localised at centre-of-mass coordinates  $\mathbf{x}(t)$  (red: per frame, black: averaged over  $O(10^3)$  frames), evolve cyclically around an average trajectory. The average value is  $|\mathbf{F}|/8\pi\mu \sim 1910 \mu\text{m}^2/\text{s}$ .

DOI: 10.7554/eLife.02750.008

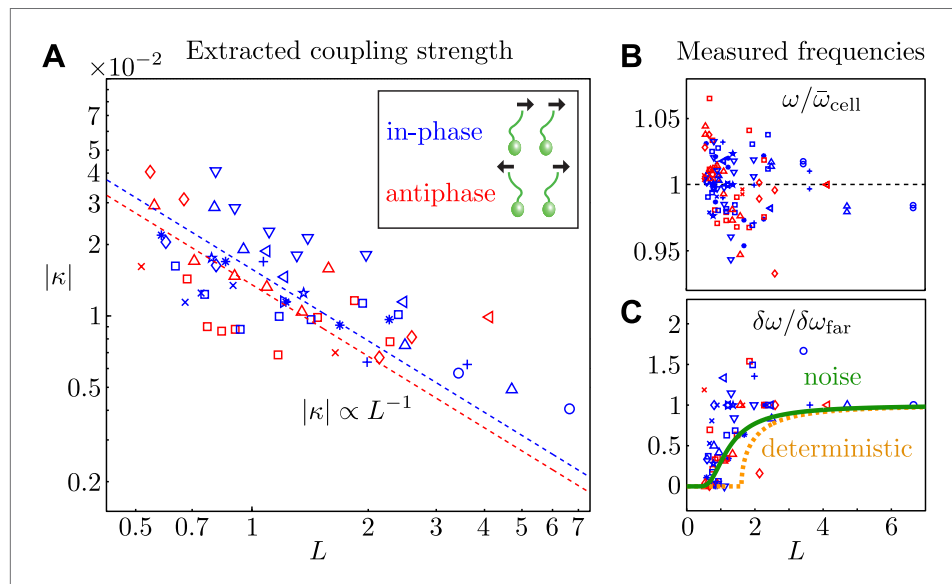

**Figure 5.** Coupling strength. **(A)** Dimensionless interflagellar coupling strength  $\kappa = \varepsilon/\bar{\omega}$  as a function of the scaled spacing  $L = d/l$  (log-log scale). The dotted lines represent fits of the form  $|\kappa| = k \times L^{-1}$  with  $k = 0.016$  (in-phase) and  $k = 0.014$  (antiphase). **(B)** Measured beat frequency  $\omega/\bar{\omega}_{\text{cell}}$  of each flagellum, nondimensionalised by the average value for that cell across several videos. **(C)** Measured frequency difference  $\delta\omega/\delta\omega_{\text{far}}$  as a function of spacing  $L$ . The curves represent the predictions based on the average extracted model parameters in the absence (orange) and presence of noise (green). Symbols represent different pairs of cells, with the in-phase (blue) and antiphase (red) configurations shown.

DOI: 10.7554/eLife.02750.010

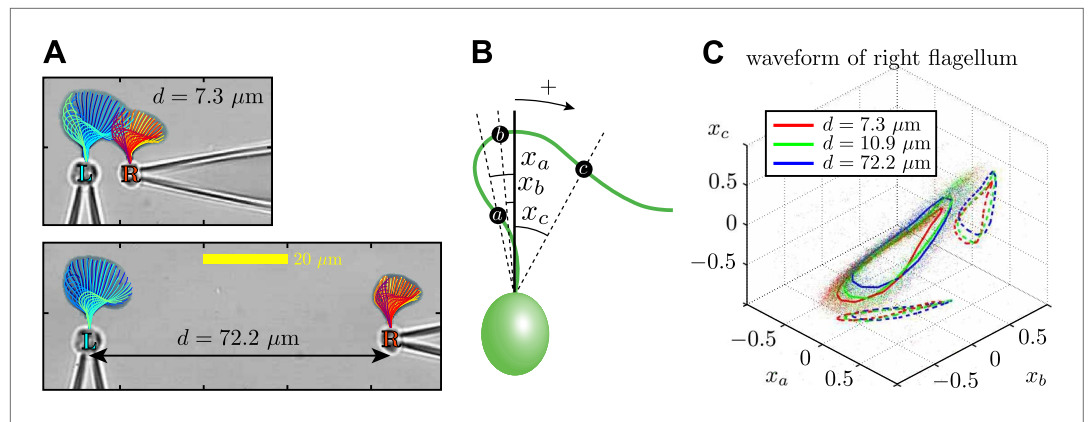

**Figure 6.** Waveform characteristics. **(A)** Logarithmically-scaled residence time plots of the entire flagella. The displayed waveforms correspond to 1 ms time intervals over several successive flagellar beats. **(B)** Angles  $x_a$ ,  $x_b$ ,  $x_c$  (in radians) measured and **(C)** their characteristic 3D trajectories. Results are shown for the right flagellum, corresponding to three different interflagellar spacings. As the spacing  $d$  is increased, the flagellar waveform exhibits a systematic change.

DOI: [10.7554/eLife.02750.011](https://doi.org/10.7554/eLife.02750.011)

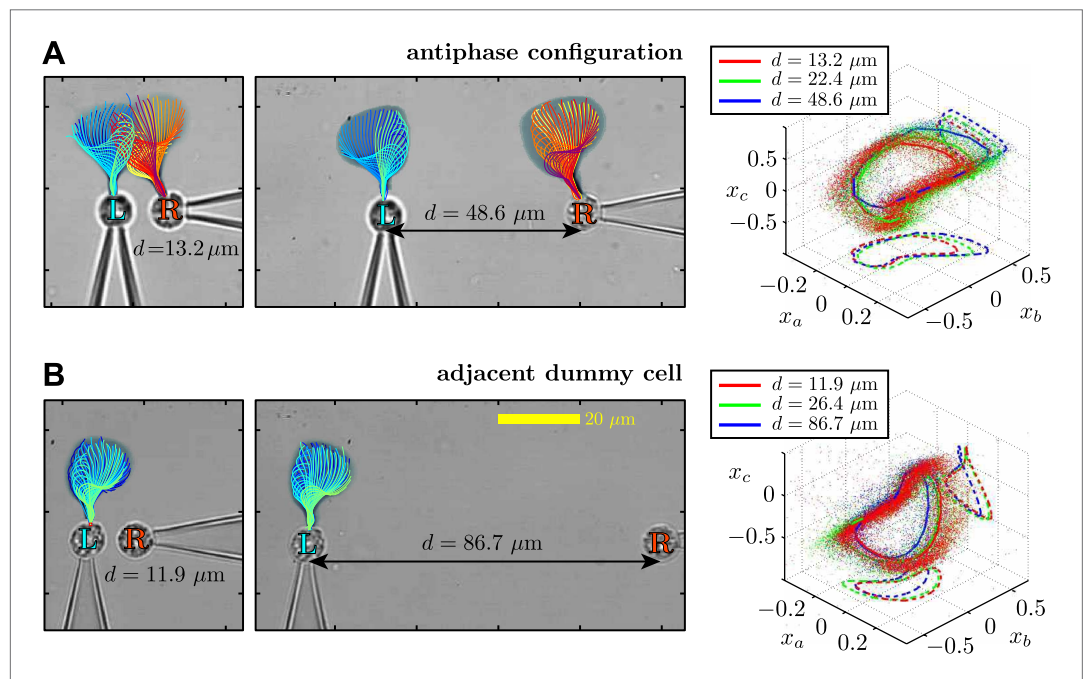

**Figure 6—figure supplement 1.** Flagellar filaments are tracked for cells in the (A) antiphase state, as well as (B) the situation in which one of the cells does not possess a flagellum (dummy cell).

DOI: [10.7554/eLife.02750.012](https://doi.org/10.7554/eLife.02750.012)

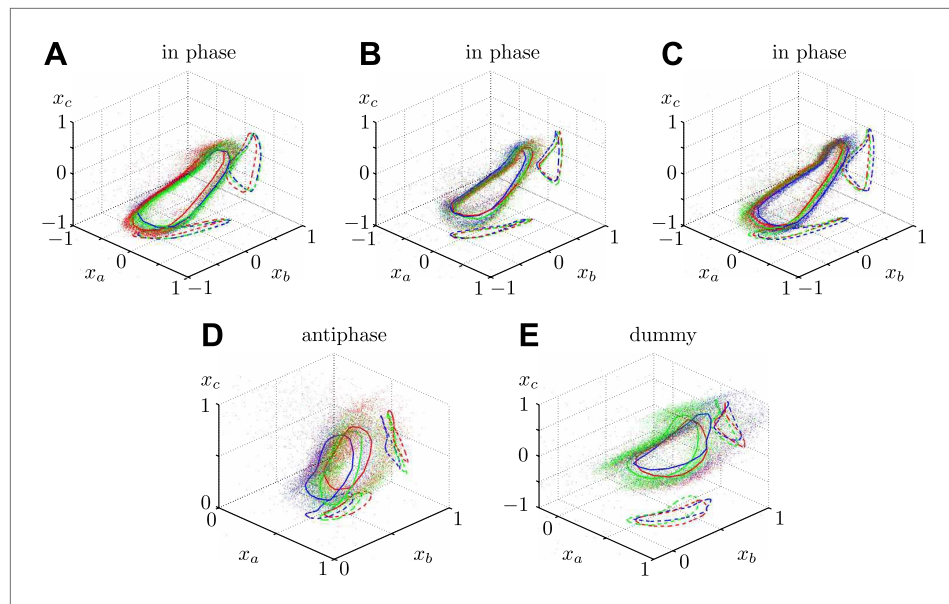

**Figure 6—figure supplement 2.** Additional waveform data collected for 5 different cells in various geometric configurations.

DOI: [10.7554/eLife.02750.013](https://doi.org/10.7554/eLife.02750.013)

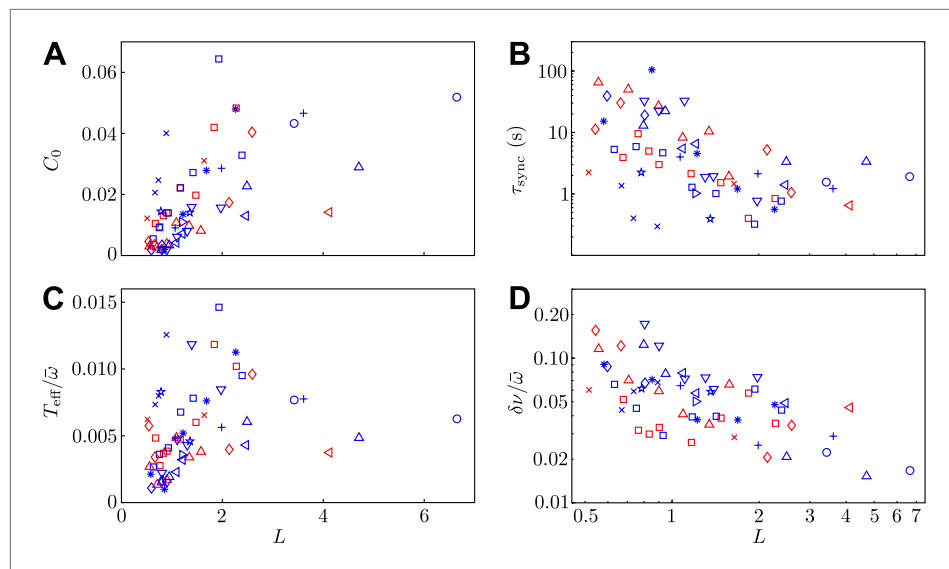

**Figure 7.** Model parameters. Two of the experimental observables **(A)**  $C_0$  and **(B)**  $\tau_{\text{sync}}$ , and the two additional model parameters **(C)**  $T_{\text{eff}}/\bar{\omega}$  and **(D)**  $\delta\nu/\bar{\omega}$  are shown as functions of interflagellar spacing for all experiments conducted.

DOI: [10.7554/eLife.02750.015](https://doi.org/10.7554/eLife.02750.015)



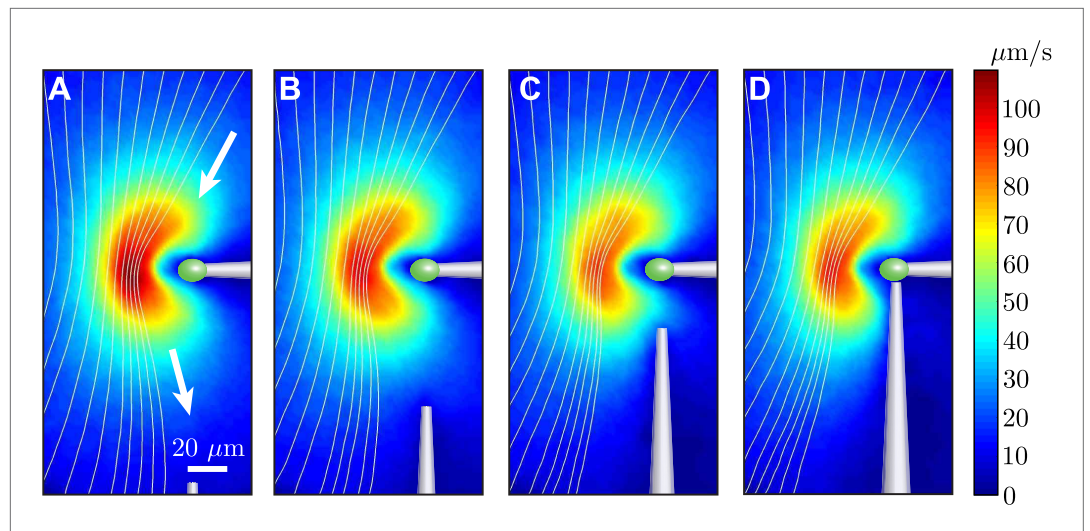

**Figure 8.** Effect of nearby pipette. The time-averaged flow field associated with one captured cell is measured as a second pipette slowly approaches. This demonstrates that the precise angle from which the cell is held by the micropipette has very little effect on the resultant flow field.

DOI: [10.7554/eLife.02750.016](https://doi.org/10.7554/eLife.02750.016)

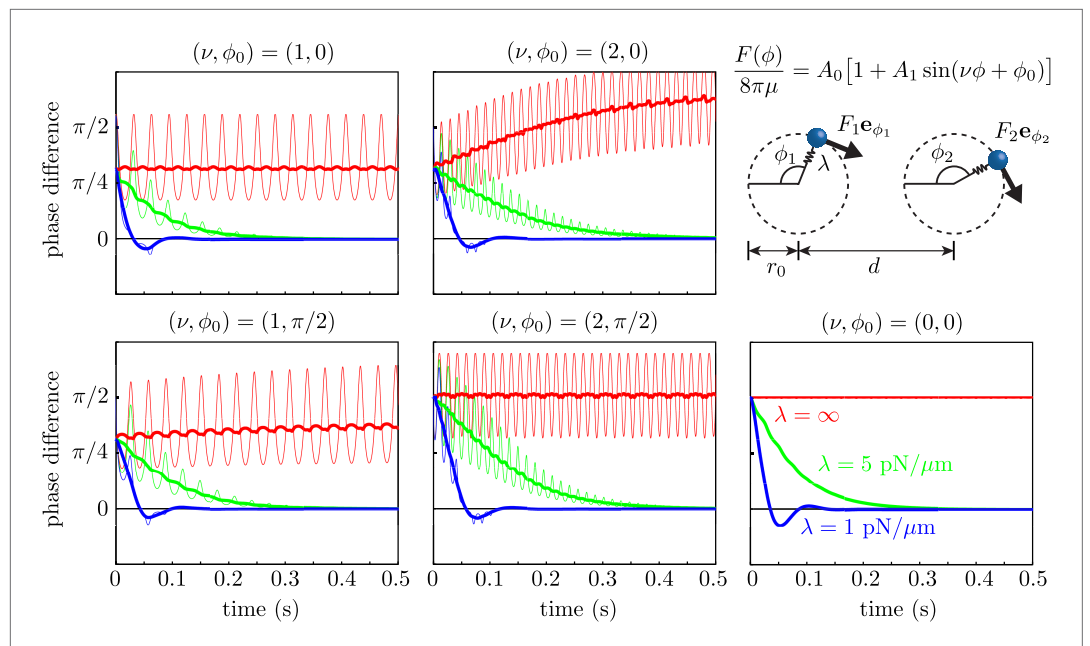

**Figure 9.** Effect of force modulation. Evolution of the phase difference  $\delta = \phi_1 - \phi_2$  among two identical model oscillators, each composed of a sphere driven around a circular trajectory by a tangential driving force. The trajectories each possess a radial stiffness  $\lambda$ . Smaller values of  $\lambda$  yield rapid convergence towards synchrony ( $\delta = 0$ ), in a manner essentially independent of the functional form of the driving force. Parameters used are given by  $a = 0.75 \mu\text{m}$ ,  $r_0 = 8 \mu\text{m}$ ,  $d = 20 \mu\text{m}$ ,  $A_0 = 1076 \mu\text{m}^2/\text{s}$  and  $A_1 = 0.56$ .

DOI: [10.7554/eLife.02750.017](https://doi.org/10.7554/eLife.02750.017)

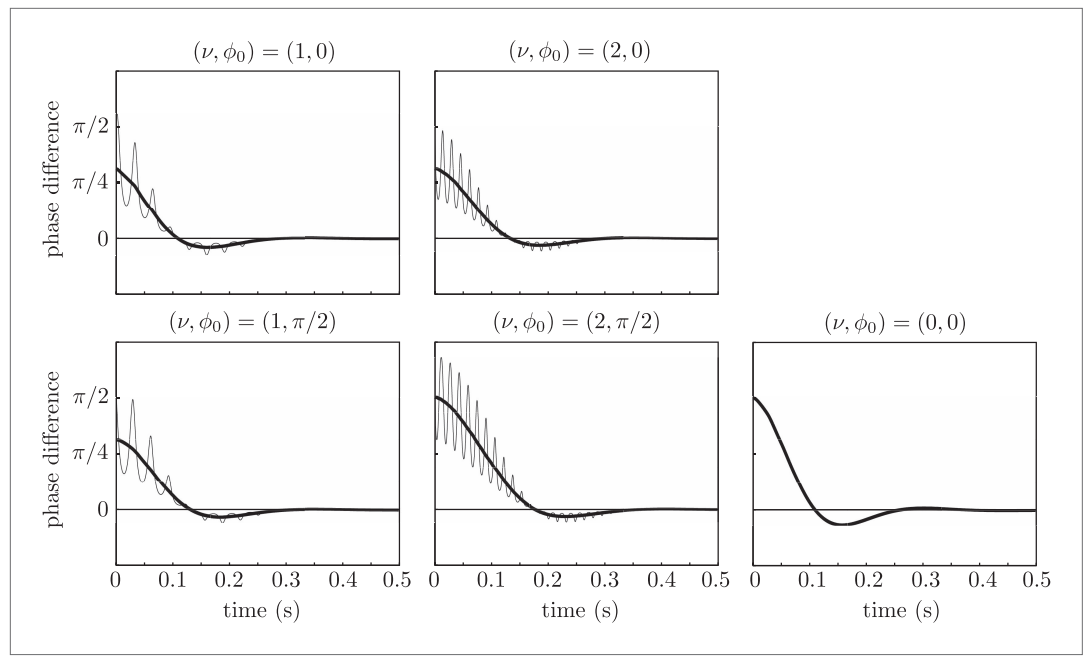

**Figure 10.** Effect of force modulation. Re-run of the simulations in **Figure 9** with properties inspired by real flagella.  
DOI: [10.7554/eLife.02750.018](https://doi.org/10.7554/eLife.02750.018)
